# Supplementary material for: Comparative Genomic Analysis of Vibrio cincinnatiensis Provides Insights into Genetic Diversity, Evolutionary Dynamics, and Pathogenic Traits of the Species
Source: MDPI journal article supplement (doi:10.3390/ijms23094520), 2022-04-20
Supplement: s1 [file s1]

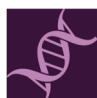

## Supplementary Figure legends

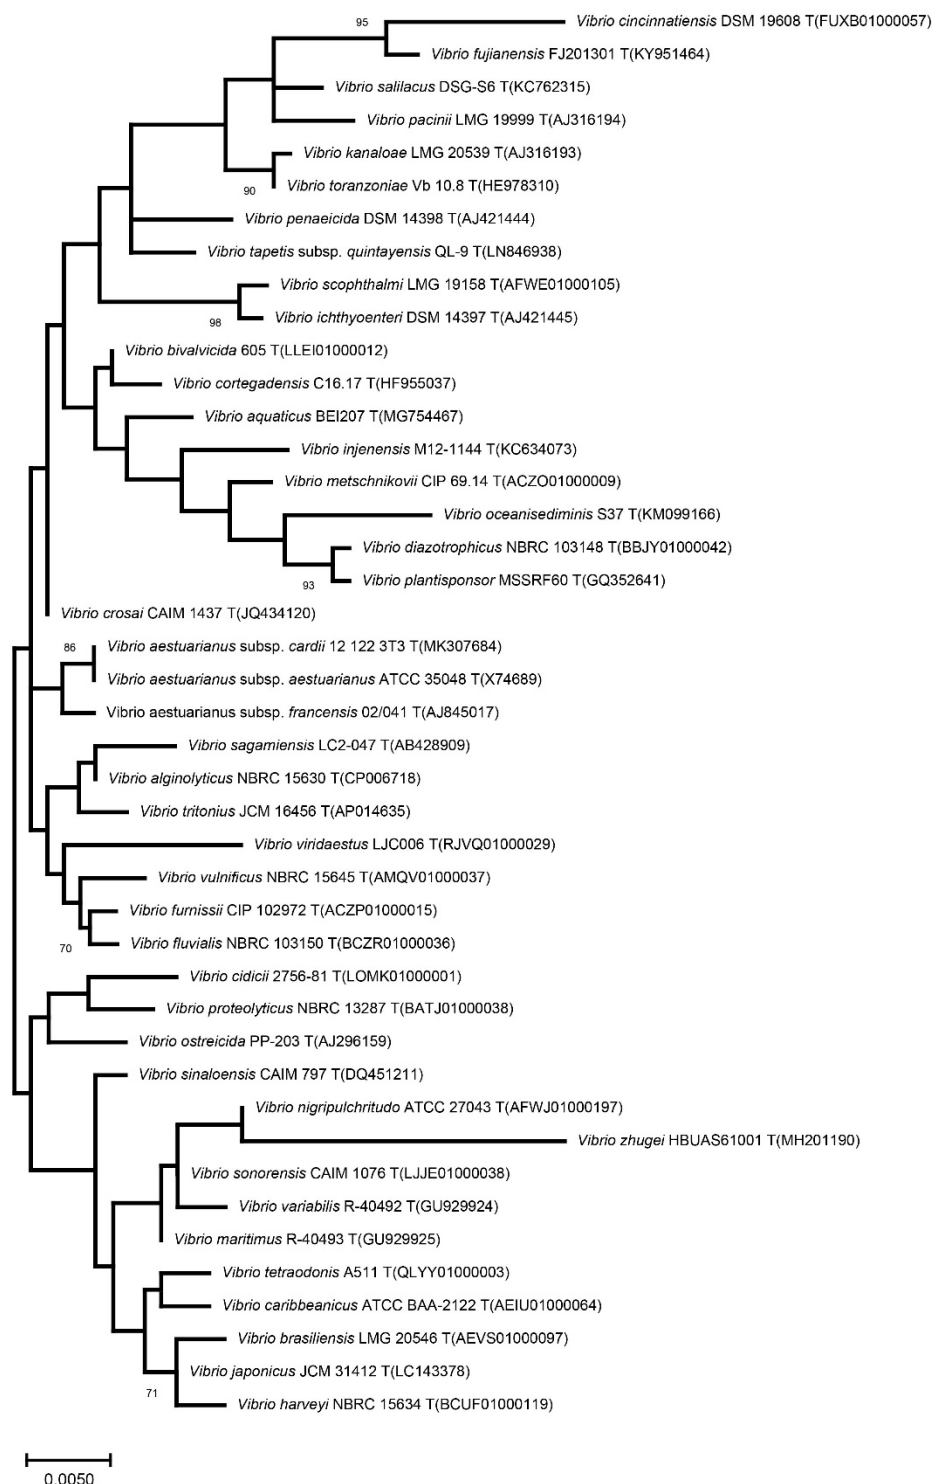

**Supplementary Figure S1.** Phylogenetic tree based on 16S rRNA sequences obtained by ML method with 1000 replicates. Numbers at nodes indicate the levels of bootstrap support (>70%).

**Supplementary Table legends**

**Supplementary Table S1.** List of public genome sequences in this study obtained from the GenBank database in NCBI.

**Supplementary Table S2.** List of the pan-genome of *V. cincinnatiensis*, including core, accessory, and strain-specific gene.

**Supplementary Table S3.** List of MGEs and barriers to HGT in the *V. cincinnatiensis* genomes.

**Supplementary Table S4.** List of the positively selected gene families ( $dN/dS > 1$ ).

**Supplementary Table S5.** List of 16S rRNA sequences used in Fig. S1.

**Supplementary Table S6.** List of virulence-related elements in *V. cincinnatiensis*.

**Supplementary Table S7.** List of the virulence-related genes in *V. cincinnatiensis*.
